# Supplementary material for: Bone-Targeting AAV-Mediated Gene Silencing in Osteoclasts for Osteoporosis Therapy
Source: PubMed Central journal article supplement (PMC7210389; doi:10.1016/j.omtm.2020.04.010), 2020-04-18
Supplement: mmc1.pdf [file mmc1.pdf]

**OMTM, Volume 17**

**Supplemental Information**

**Bone-Targeting AAV-Mediated Gene Silencing  
in Osteoclasts for Osteoporosis Therapy**

**Yeon-Suk Yang, Jun Xie, Sachin Chaugule, Dan Wang, Jung-Min Kim, JiHea Kim, Phillip W.L. Tai, Seok-kyo Seo, Ellen Gravallesse, Guangping Gao, and Jae-Hyuck Shim**

1 **Supplementary Information**

2

3 **Bone-targeting AAV9-mediated gene silencing in osteoclasts for osteoporosis**  
4 **therapy**

5

6 Yeon-Suk Yang<sup>1</sup>, Jun Xie<sup>2, 3, 4</sup>, Sachin Chaugule<sup>1</sup>, Dan Wang<sup>2, 3</sup>, Jung-Min Kim<sup>1</sup>, JiHea Kim<sup>1</sup>,  
7 Phillip W.L. Tai<sup>2, 3</sup>, Seok-kyo Seo<sup>5</sup>, Ellen Gravalles<sup>6</sup>, Guangping Gao<sup>2, 3, 4, 7\*</sup>, and Jae-Hyuck  
8 Shim<sup>1, 7\*</sup>

9

10 <sup>1</sup>Division of Rheumatology, University of Massachusetts Medical School, Worcester, MA, USA

11 <sup>2</sup>Horae Gene Therapy Center, <sup>3</sup>Department of Microbiology and Physiological Systems, <sup>4</sup>Viral  
12 Vector Core, University of Massachusetts Medical School, Worcester, MA, USA

13 <sup>5</sup>Department of Obstetrics and Gynecology, Severance Hospital, Yonsei University College of  
14 Medicine, Seoul, Korea

15 <sup>6</sup>Division of Rheumatology, Immunology and Allergy, Brigham and Women's Hospital, Boston,  
16 MA, USA

17 <sup>7</sup>Li Weibo Institute for Rare Diseases Research, University of Massachusetts Medical School,  
18 Worcester, MA, USA

19

20 \*To whom correspondence should be addressed.

21 Jae-Hyuck Shim and Guangping Gao

**A**

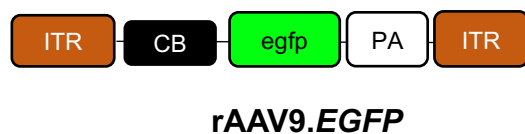

**B**

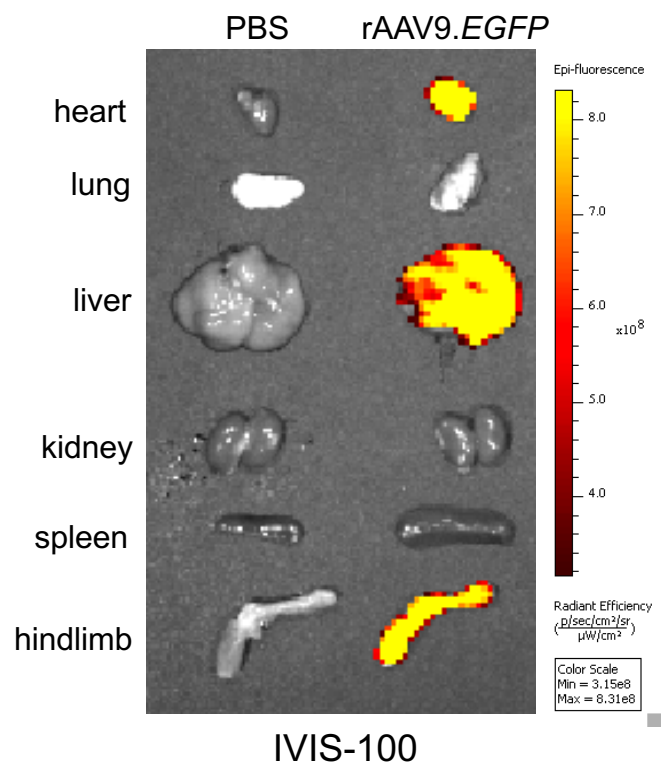

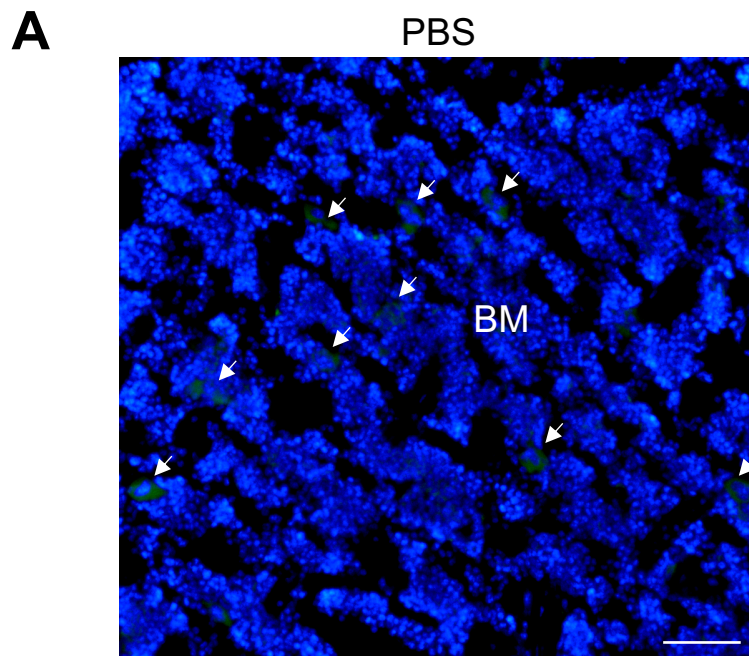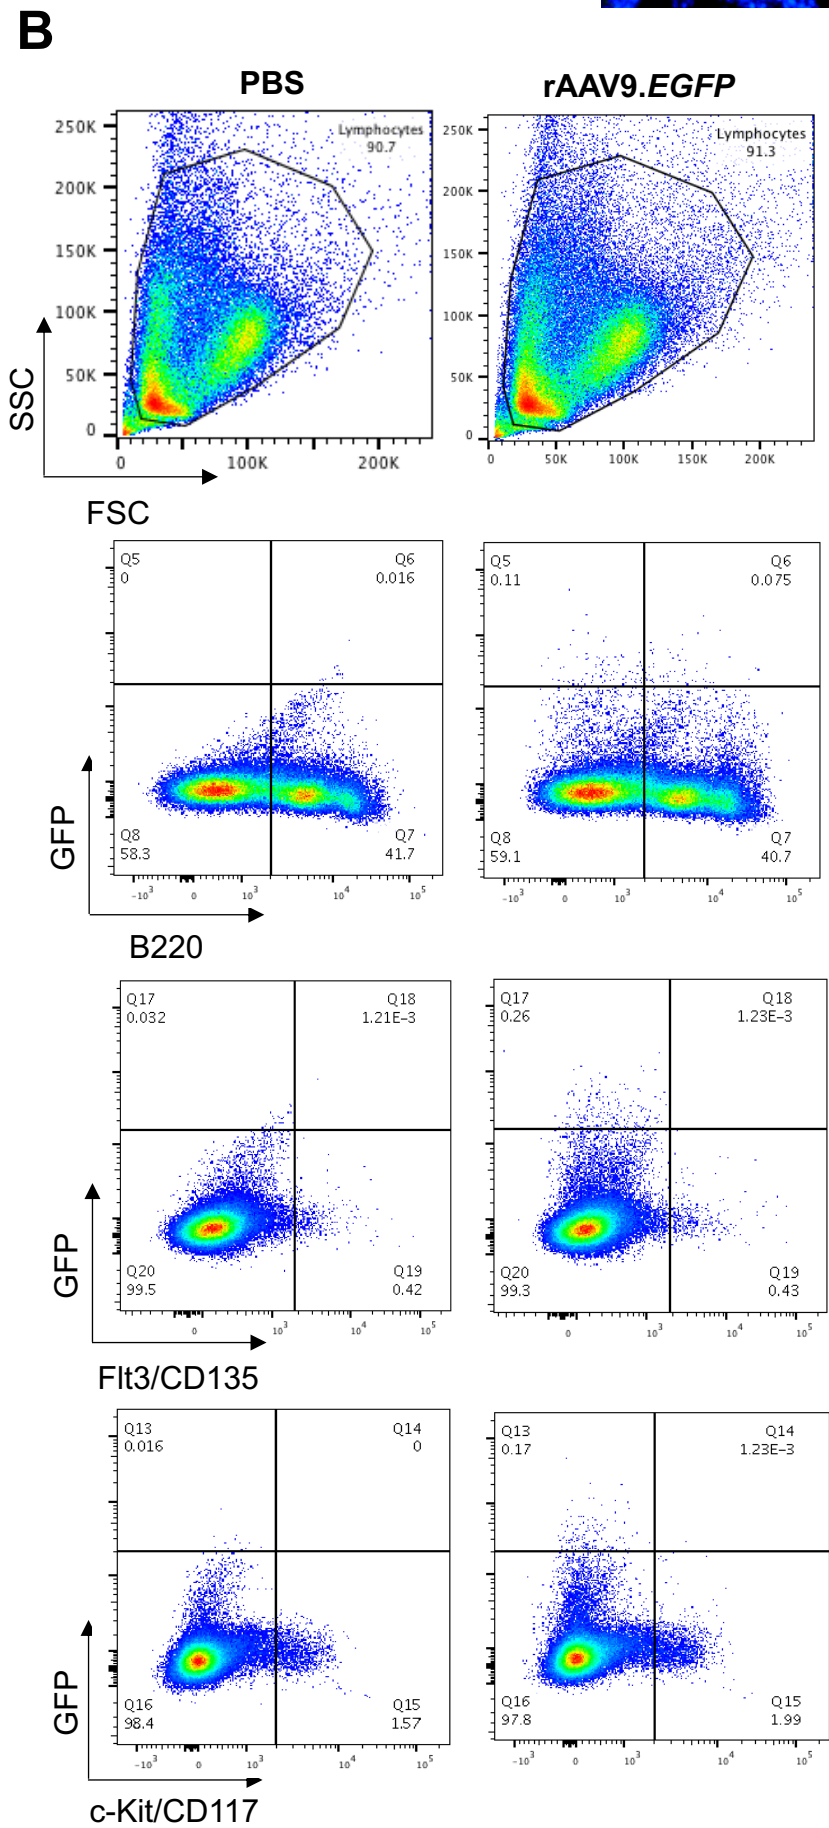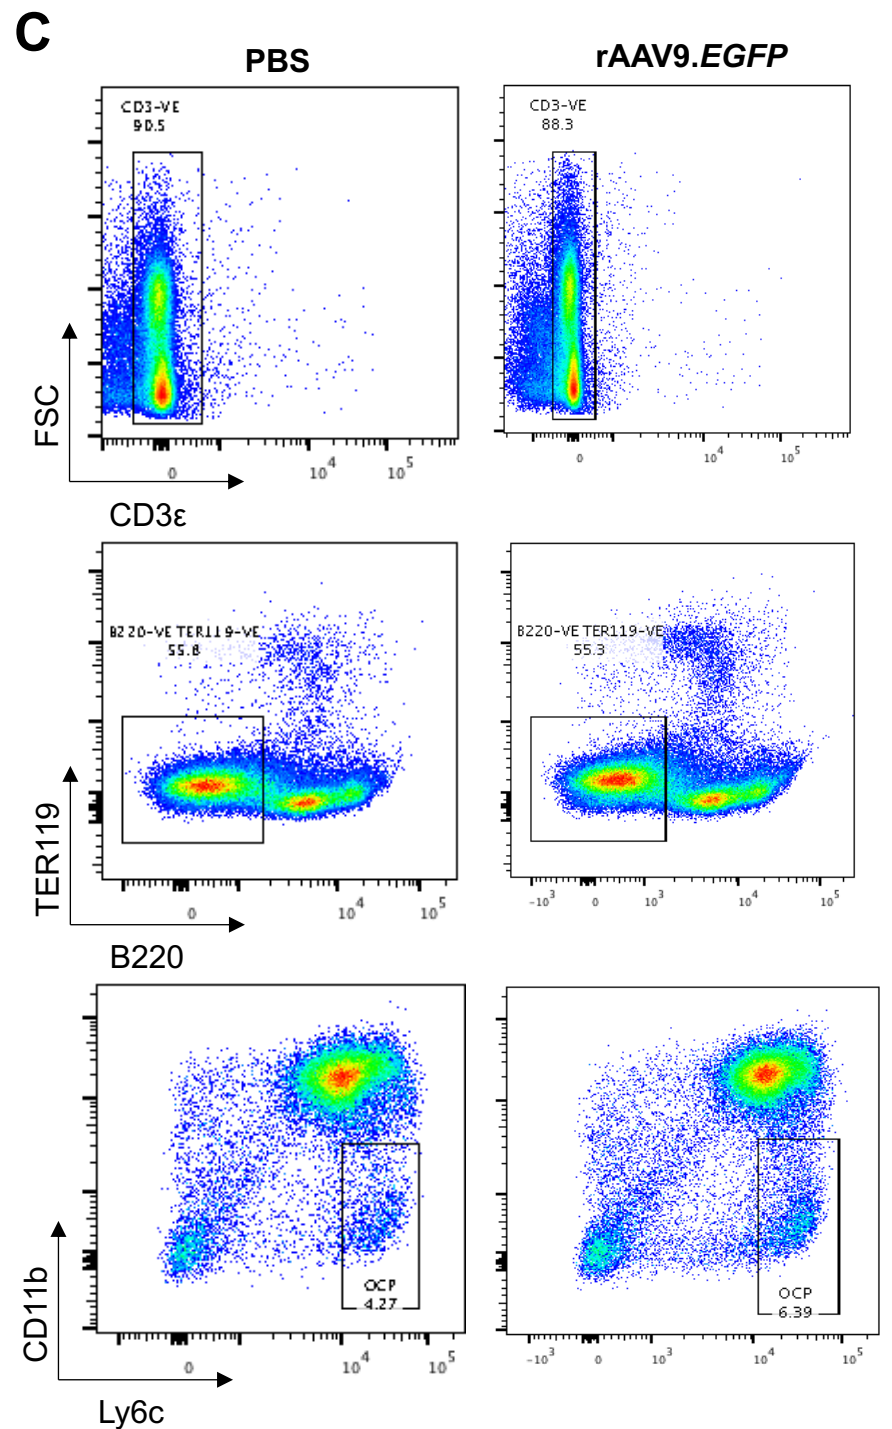

**Supplementary Figure 2**

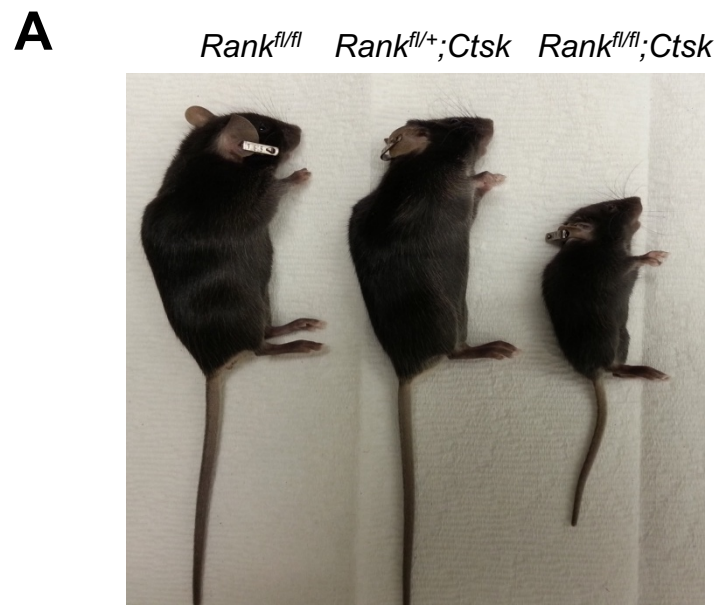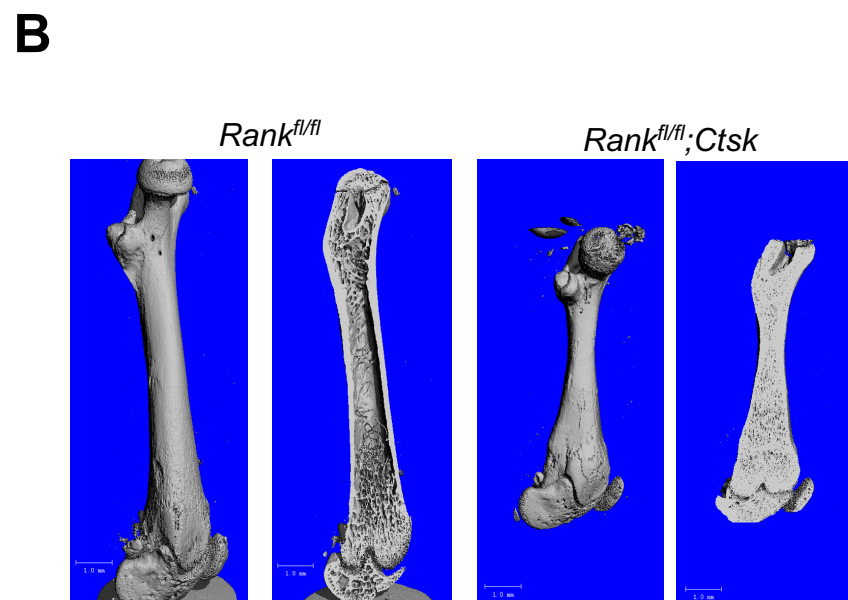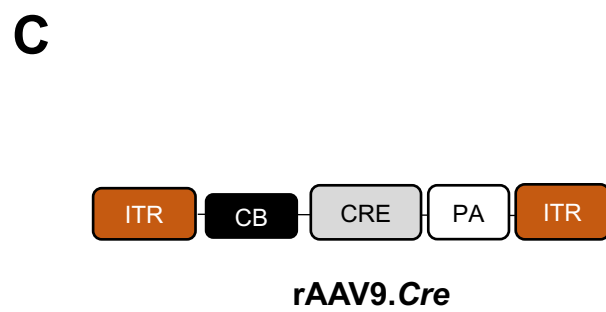

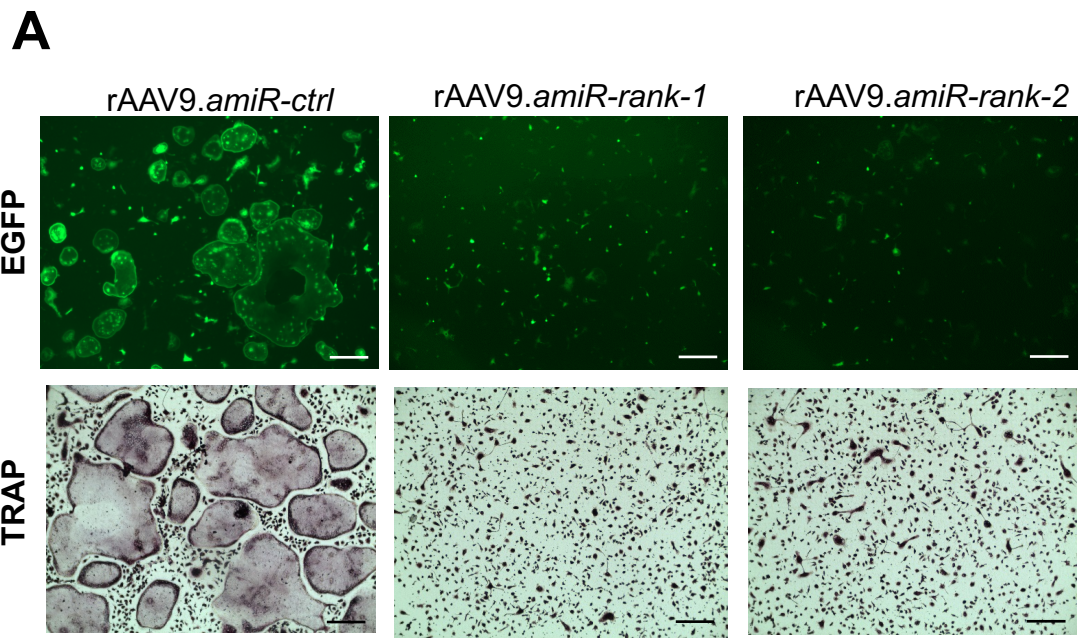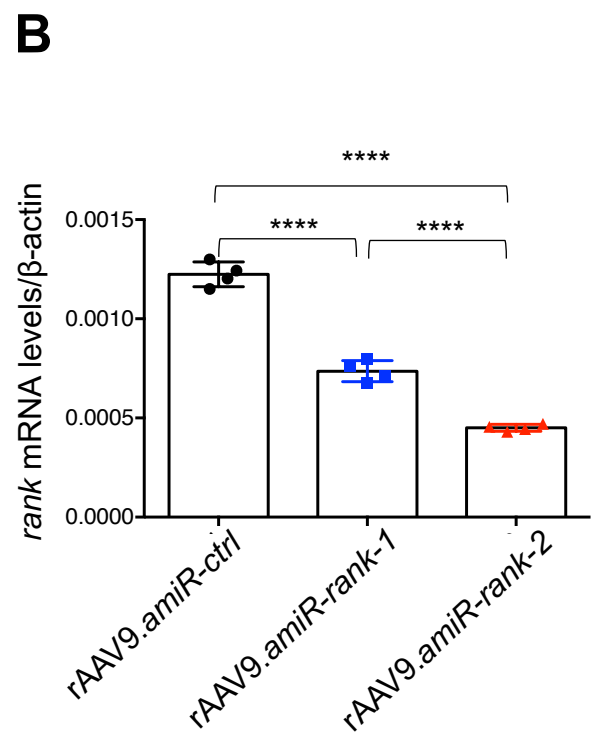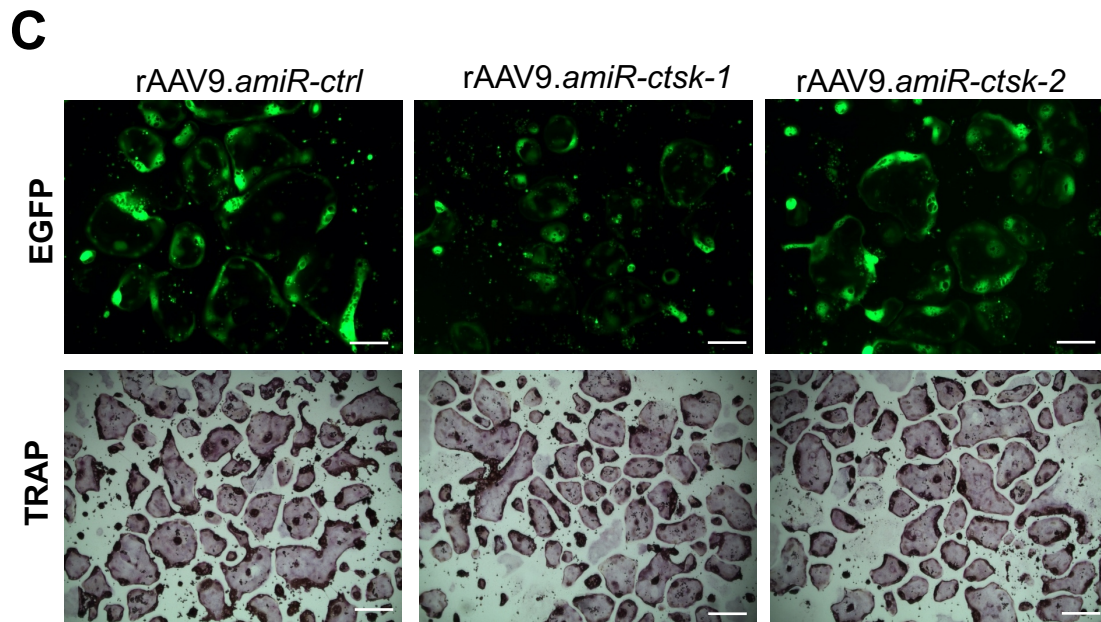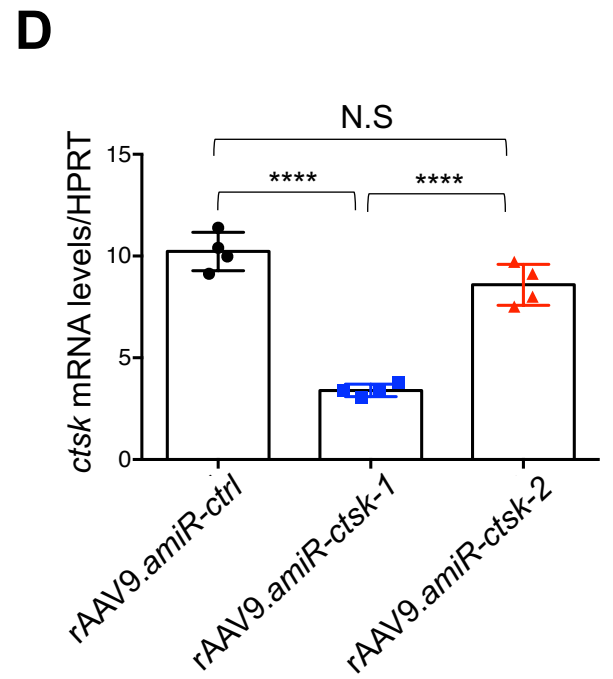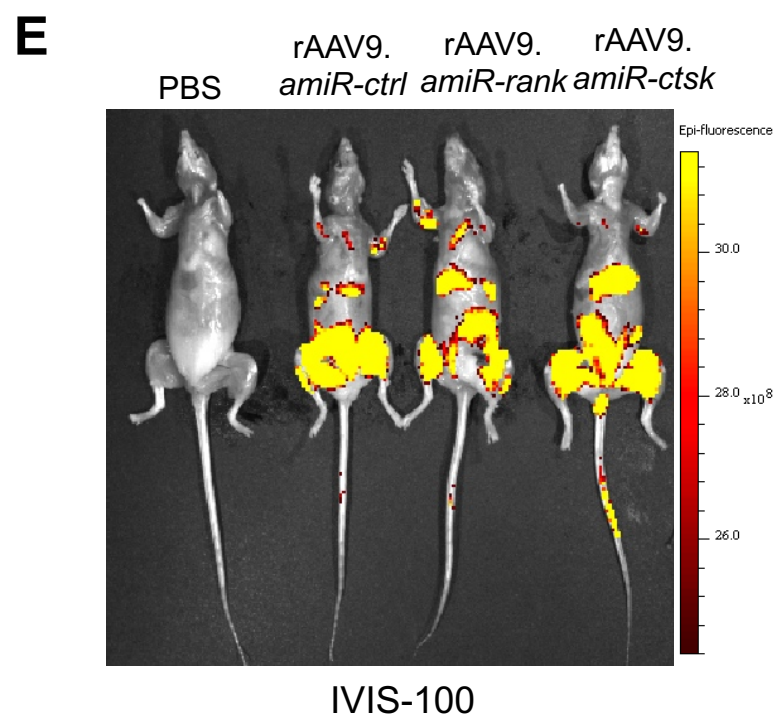

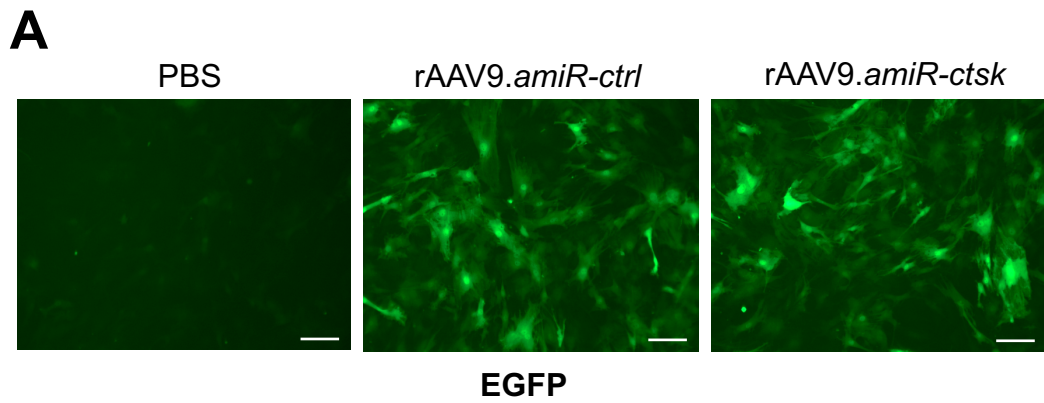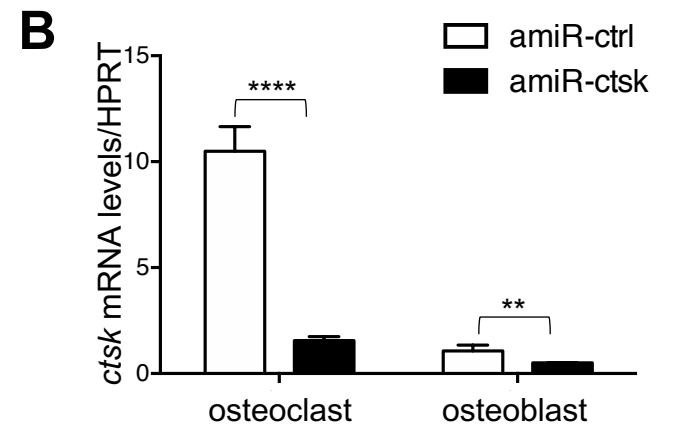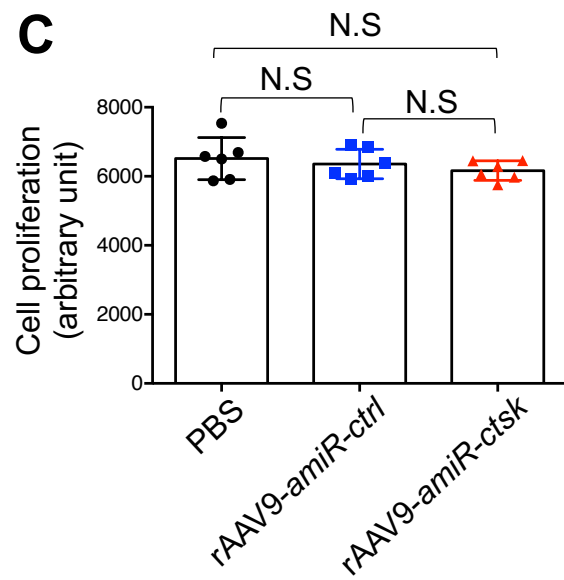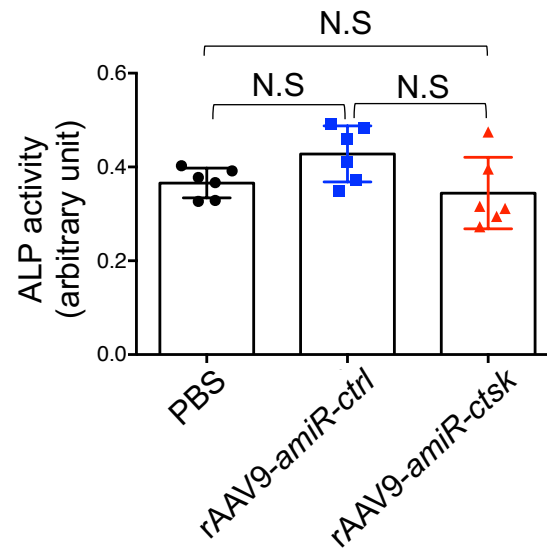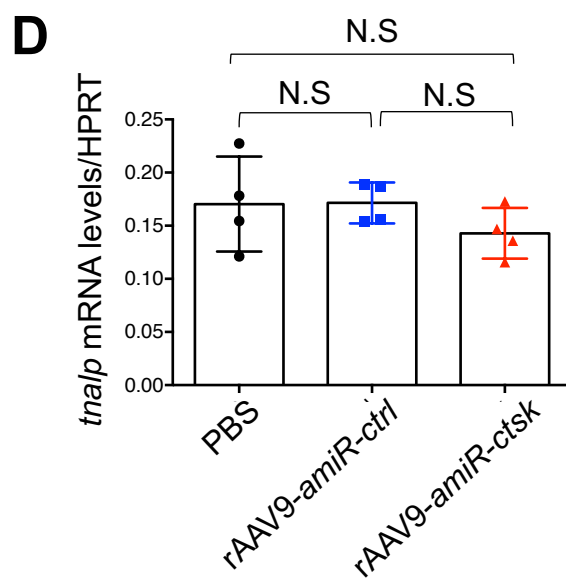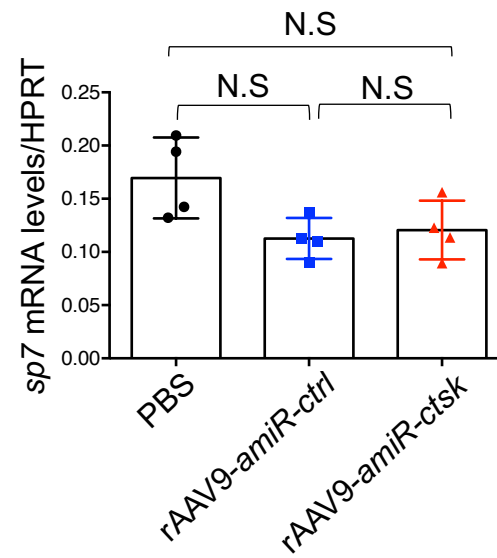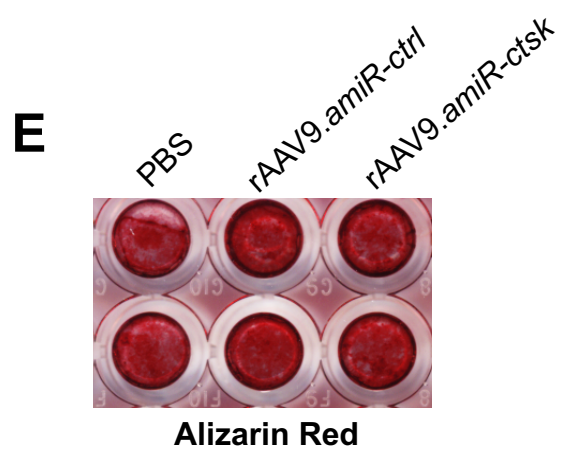

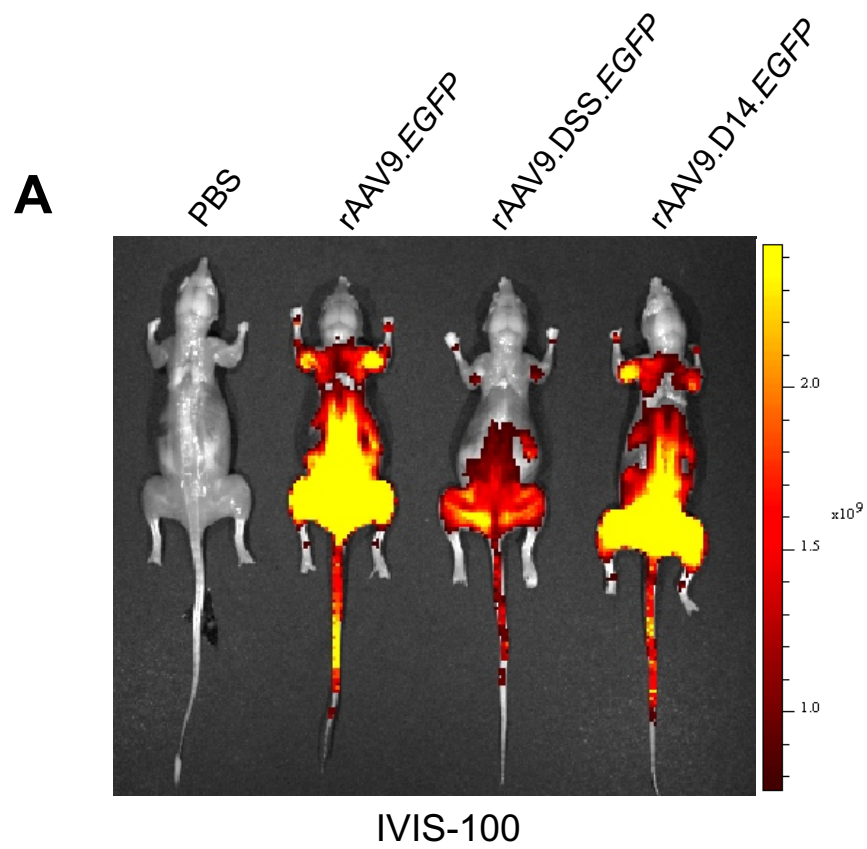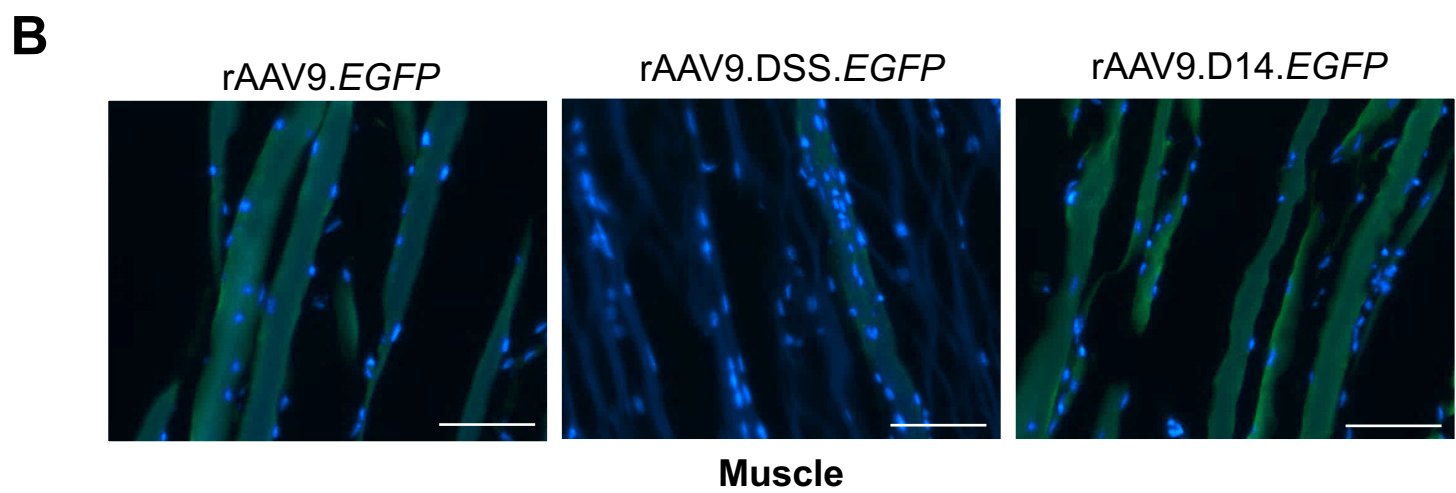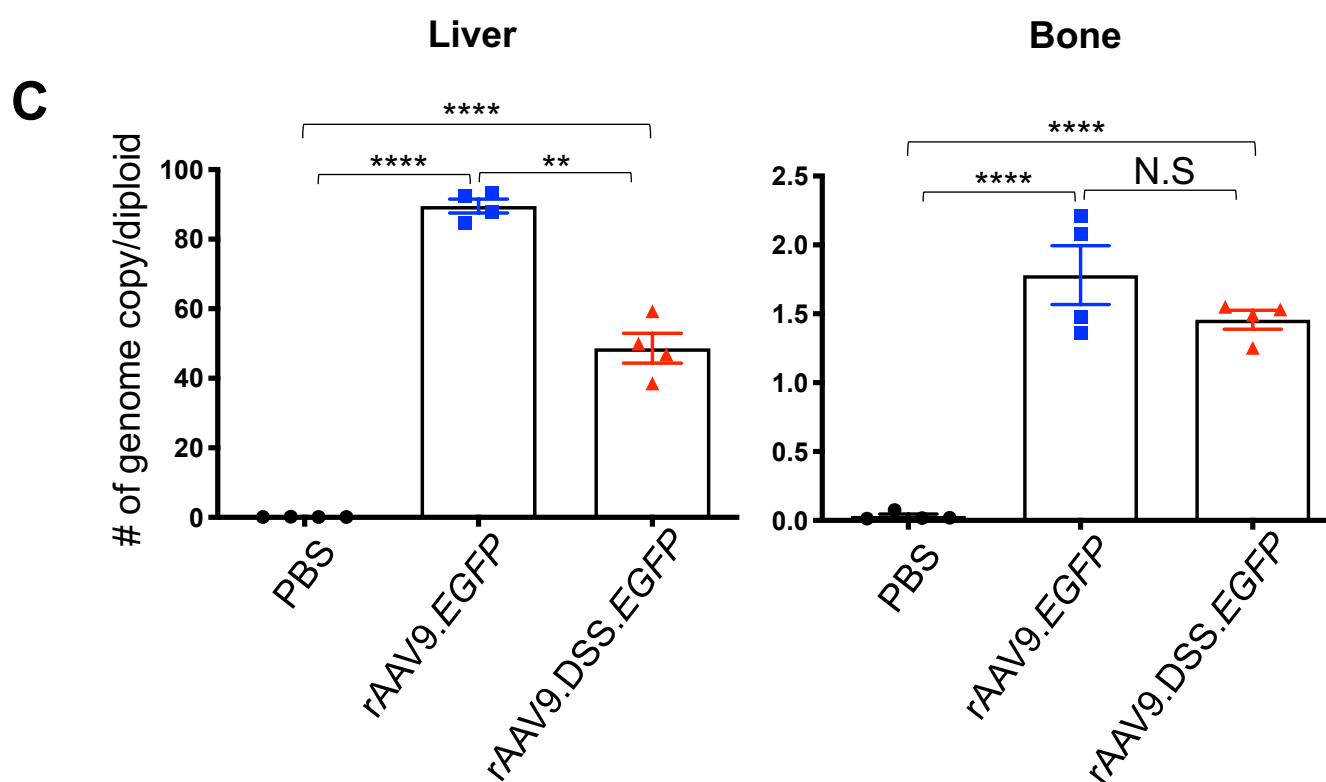

**Supplementary Figure 6**



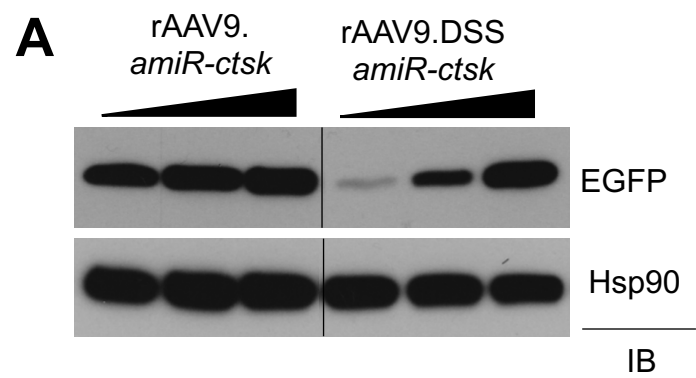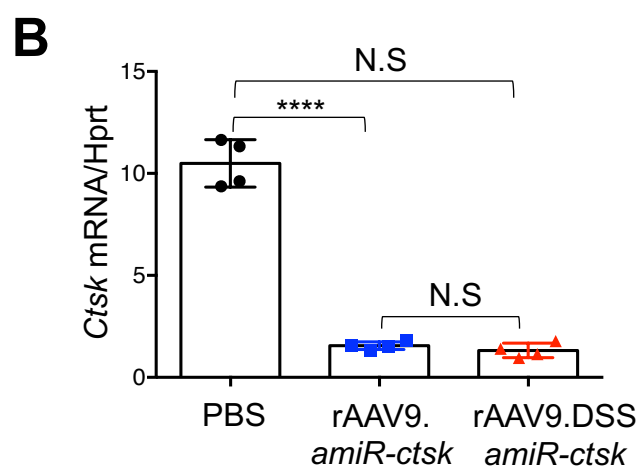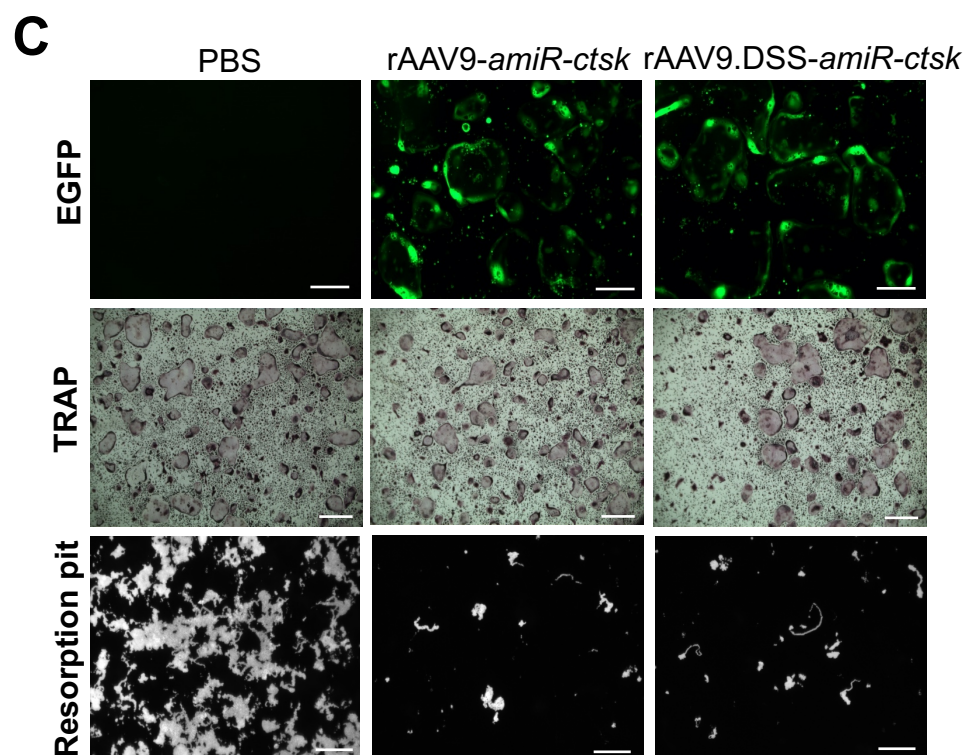

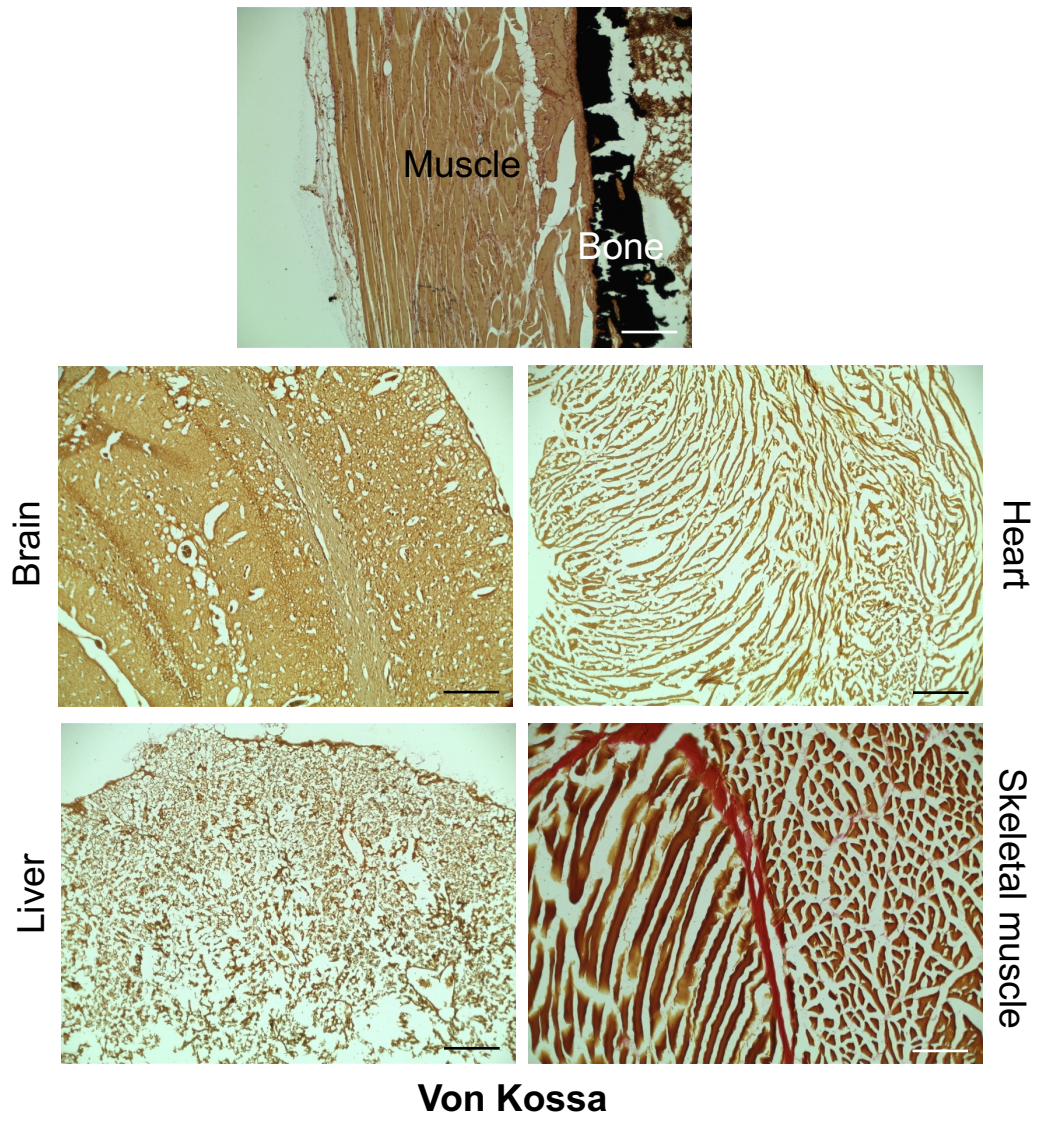

## 22 **Supplementary Figure legends**

23 **Supplementary Figure 1: Tissue distribution of systemically delivered rAAV9.EGFP in**  
24 **mice.**

25 **(A)** Diagram of the rAAV9 construct containing a CMV enhancer/chicken  $\beta$ -actin promoter (CB),  
26 an EGFP reporter gene (EGFP),  $\beta$ -globin polyA sequence (PA), and inverted terminal repeats  
27 (ITR). **(B)** A single dose of PBS or  $8 \times 10^{11}$  genome copies (GCs) of rAAV.EGFP was  
28 intravenously (i.v.) injected into two-month-old male mice, and EGFP expression in individual  
29 tissues was quantified by IVIS-100 optical imaging two weeks post-injection. Scale bar  
30 represents relative fluorescence ( $\text{p/sec/cm}^2/\text{sr}/\mu\text{W/cm}^2$ ).

31

32 **Supplementary Figure 2: Identification of a subset of bone marrow cells transduced by**  
33 **systemically delivered rAAV9.**

34 A single dose of PBS or  $8 \times 10^{11}$  genome copies (GCs) of rAAV.EGFP was intravenously (i.v.)  
35 injected into two-month-old male mice, and EGFP expression was assessed in cryo-sectioned  
36 femurs by fluorescence microscopy two weeks post-injection. Arrows indicate megakaryocytes  
37 with auto-fluorescence **(A)**. Cell-type specific evaluation of EGFP expression by isolation of  
38 bone marrow cells and staining with the indicated antibodies for quantification by flow cytometry  
39 **(B, C)**. Representative flow cytometry dot plots show the gating strategy of osteoclast  
40 progenitors (OCP;  $\text{CD3}\epsilon^-$ ,  $\text{B220}^-$ ,  $\text{TER119}^-$ ,  $\text{CD11b}^{-/\text{o}}$ ,  $\text{Ly6c}^+$ ) described in **Figure 1C (C)**.

41

42 **Supplementary Figure 3: Characterization of mice lacking Rank in cathepsin K-**  
43 **expressing osteoclasts**

44 Mice with conditional alleles of *Rank* were crossed with transgenic mice with the cathepsin K  
45 promoter-driven expression of Cre recombinase. Representative image showing one-month-old  
46 female *Rank<sup>fl/fl</sup>* (wildtype), *Rank<sup>fl/+</sup>;Ctsk* (heterozygote), and *Rank<sup>fl/fl</sup>;Ctsk* (knockout) mice (**A**).  
47 MicroCT analysis of one-month-old *Rank<sup>fl/fl</sup>* and *Rank<sup>fl/fl</sup>;Ctsk* femurs, demonstrating that deletion  
48 of *Rank* in osteoclasts results in osteopetrosis in mice (**B**). Diagram of rAAV9 constructs  
49 containing the CMV enhancer/chicken  $\beta$ -actin promoter (CB), Cre recombinase (Cre),  *$\beta$ -globin*  
50 polyA sequence (PA), and inverted terminal repeats (ITR) (**C**).

51

52 **Supplementary Figure 4: Effects of rAAV9 carrying *amiR-rank* or *amiR-ctsk* on osteoclast**  
53 **differentiation and resorption activity *in vitro*.**

54 **(A-D)** The amiR cassettes targeting two different positions of *rank* (*amiR-rank-1, -2*) or *ctsk*  
55 (*amiR-ctsk-1, -2*) mRNA were packaged with AAV9 capsids. Targeting sequences are described  
56 in **Table S1**. Bone marrow-derived monocytes (BMMs) harvested from two-month-old wildtype  
57 mice were treated with M-CSF and RANKL for two days to differentiate them into pre-  
58 osteoclasts (pre-OCs). Wildtype pre-OCs were transduced with either rAAV9 carrying *amiR-ctrl*,  
59 *amiR-rank-1, -2*, or *amiR-ctsk-1, -2* ( $10^{11}$  GC), and then cultured with M-CSF and RANKL for  
60 four days to differentiate them into mature osteoclasts. Transduction efficiency and osteoclast  
61 differentiation were assessed by EGFP expression and TRAP staining, respectively (**A, C**).  
62 Levels of *rank* or *ctsk* mRNA were measured by RT-PCR and normalized to *hprt* (**B, D**) (n =  
63 4/group). Scale bars: 1 mm. Values represent mean  $\pm$  SD: N.S, not significant and \*\*\*\*, P <  
64 0.0001 by an unpaired two-tailed Student's t-test and one-way ANOVA test.

65 **(E)** A single dose of PBS or  $8 \times 10^{11}$  GCs of rAAV9 carrying *amiR-ctrl*, *amiR-rank-2*, or *amiR-*  
66 *ctsk-1* was i.v. injected into two-month-old female mice, and two months later, EGFP expression

67 in whole body was monitored by IVIS-100 optical imaging. Scale bar represents relative  
68 fluorescence ( $\text{p/sec/cm}^2/\text{sr}/\mu\text{W/cm}^2$ ).

69

70 **Supplementary Figure 5: Effects of rAAV9.amir-ctsk on osteoblast differentiation *in***  
71 ***vitro*.**

72 Two days after treatment with PBS, rAAV9.amir-ctrl, or rAAV9.amir-ctsk, primary calvarial  
73 osteoclast (COBs) were cultured under osteogenic conditions for six days and transduction  
74 efficiency was assessed by EGFP expression using fluorescence microscopy **(A)**. mRNA levels  
75 of *ctsk* **(B)** and osteogenic genes **(D)** were measured by RT-PCR and normalized to *hprt*,  
76 demonstrating that *ctsk* mRNA levels in COBs are significantly lower than those in mature  
77 osteoclasts derived from BMMs **(B)**. Alamar blue staining and alkaline phosphatase activity are  
78 displayed **(C)**. After 21 days of culturing, mineralization was assessed by alizarin red staining  
79 **(E)**. Scale bars: 1 mm. Values represent mean  $\pm$  SD: N.S, not significant; \*\*,  $P < 0.01$ ; and \*\*\*\*,  
80  $P < 0.0001$  by an unpaired two-tailed Student's t-test and one-way ANOVA test.

81

82 **Supplementary Figure 6: Tissue distribution of systemically-delivered rAAV9.DSS.EGFP**  
83 **in mice.**

84 **(A-C)** A single dose of PBS or  $8 \times 10^{11}$  GCs of rAAV9, rAAV9.DSS-Nter, or rAAV9.D14-Nter  
85 was i.v. injected into two-month-old male mice. EGFP expression of the whole body was  
86 quantified by IVIS-100 optical imaging two weeks post-injection. Scale bar represents relative  
87 fluorescence ( $\text{p/sec/cm}^2/\text{sr}/\mu\text{W/cm}^2$ ) **(A)**. Representative fluorescence microscopy images of  
88 cryo-sectioned skeletal muscle at high magnification. Scale bars: 50  $\mu\text{m}$  **(B)**. Genome copies of

89 PBS, rAAV9.*EGFP*, and rAAV9.DSS-Nter.*EGFP* in the liver and tibia were measured by ddPCR  
90 **(C)**.

91

92 **Supplementary Figure 7: Effects of rAAV9.DSS-*amiR-ctsk* on osteoclast differentiation**  
93 **and resorption activity *in vitro*.**

94 Two days after treatment with M-CSF and RANKL, wildtype pre-OCs were transduced with  
95 either rAAV9.*amiR-ctsk* or rAAV9.DSS-*amiR-ctsk* at three different multiplicities of infection ( $10^9$ ,  
96  $10^{10}$ ,  $10^{11}$  GC), and cultured in the presence of M-CSF and RANKL for four days. EGFP  
97 expression was assessed by immunoblotting with anti-EGFP antibody **(A)** and fluorescence  
98 microscopy ( $10^{11}$  GC, **C**). Hsp90 was used as a loading control. *ctsk* mRNA levels were  
99 measured by RT-PCR and normalized to *hprt* ( $10^{11}$  GC, **B**). Osteoclast differentiation and  
100 resorption activity were assessed by TRAP activity and resorption pit assay, respectively ( $10^{11}$   
101 GC, **D**). Scale bars: 1 mm. Values represent mean  $\pm$  SD: N.S, non-significant; \*\*\*\*,  $P < 0.0001$   
102 by an unpaired two-tailed Student's t-test and one-way ANOVA test.

103

104 **Supplementary Figure 8: Effects of rAAV9.DSS-*amiR-ctsk* on non-skeletal tissues.**

105 A single dose of  $8 \times 10^{11}$  GCs of rAAV9.DSS-*amiR-ctsk* was i.v. injected into two-month-old  
106 male mice. Two months later, Von Kossa staining was performed to assess abnormal  
107 calcification in cryo-sectioned femur, brain, heart, liver, and skeletal muscle. Scale bars: 100  
108  $\mu\text{m}$ .

109
